# Supplementary material for: Hypomethylation of FAM63B in bipolar disorder patients
Source: PubMed Central journal article supplement (PMC4865008; doi:10.1186/s13148-016-0221-6), 2016-05-11

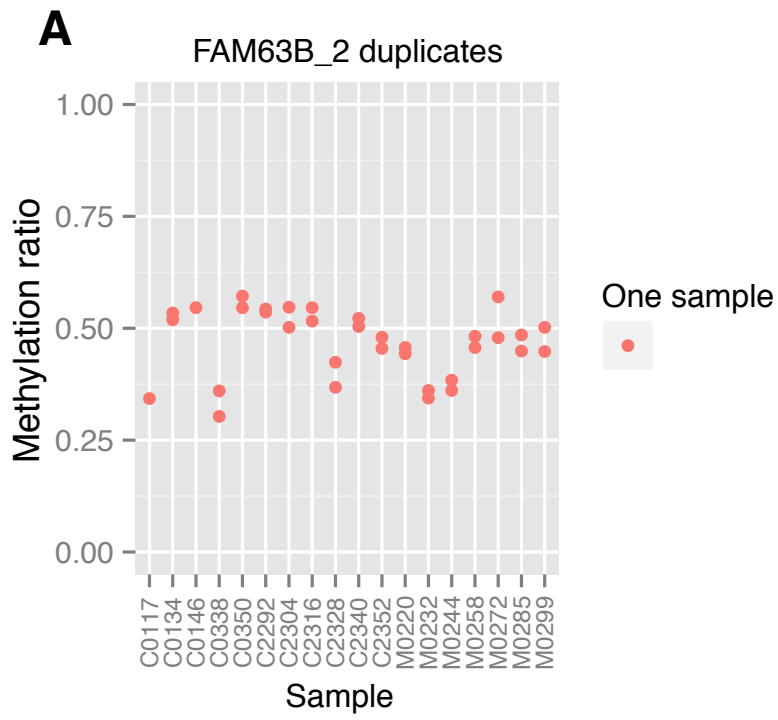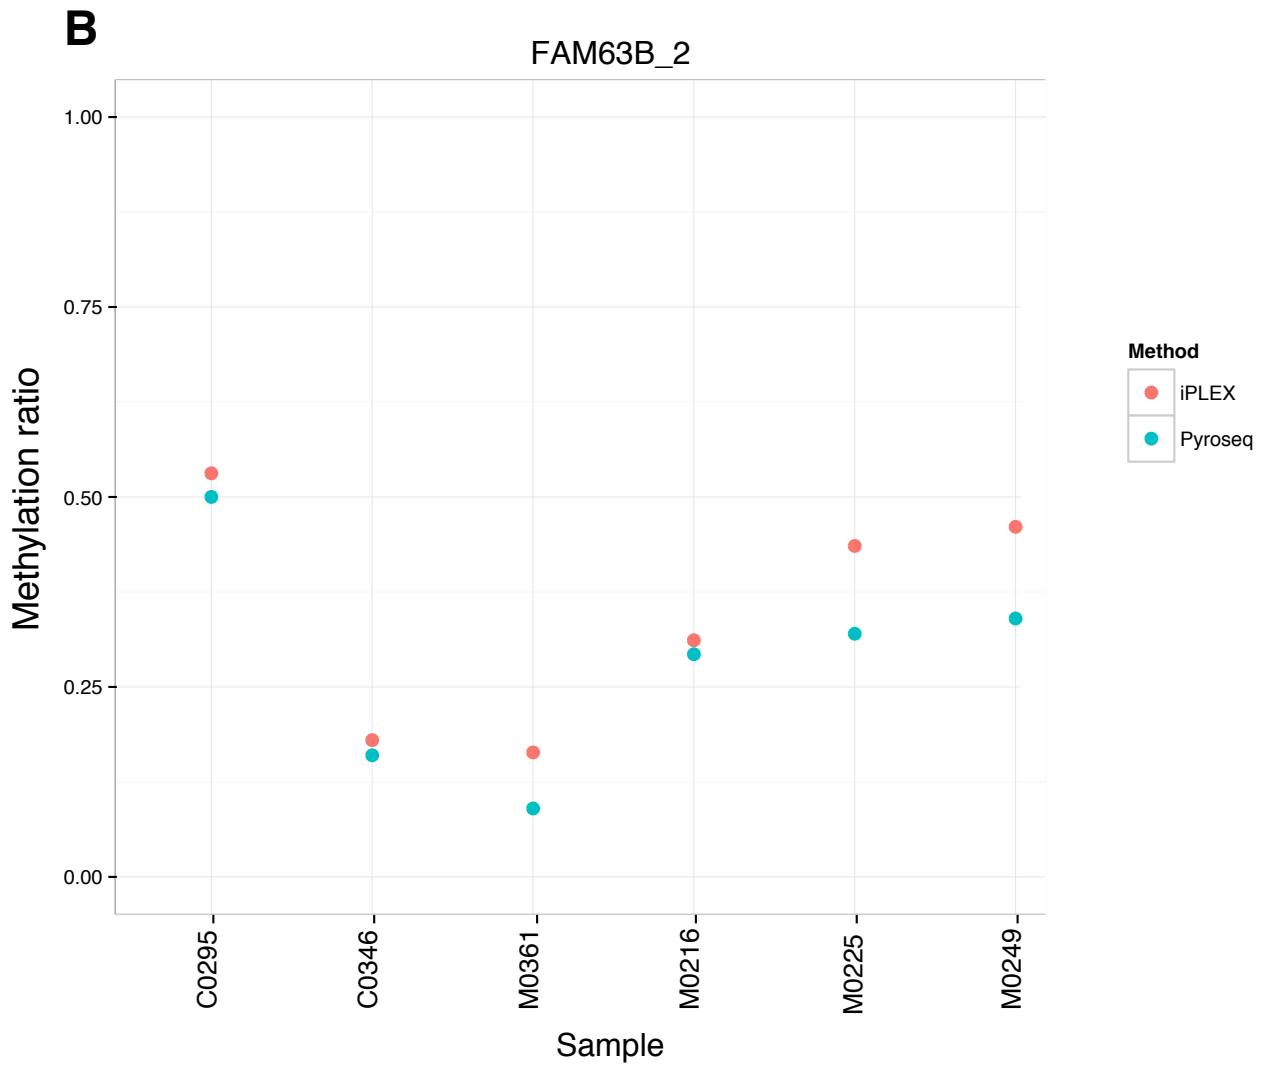

Supplement: 13148_2016_221_MOESM3_ESM.pdf [file 13148_2016_221_MOESM3_ESM.pdf]
